# Supplementary material
Source: publisher figshare collection journal article supplement (https://acs.figshare.com/ndownloader/files/10384326)
Supplement: Supplementary file 1 [file 10384326]

## Supporting Information

### Design of pH-responsive polymer monolith based on cyclodextrin vesicle for capture and release of myoglobin

Haijiao Zheng <sup>a</sup>, Xiqian Li <sup>b</sup>, Qiong Jia <sup>a, \*</sup>

<sup>a</sup> College of Chemistry, Jilin University, Changchun 130012, China

<sup>b</sup> China-Japan Hospital of Jilin University, Changchun 130033, China

#### Supporting Information Index:

|                                                     |      |
|-----------------------------------------------------|------|
| 1. Reagents and instrumentation.....                | S-2  |
| 2. Construction of poly(GMA-PETA-CDV) monolith..... | S-5  |
| 3. Sample preparation.....                          | S-6  |
| 4. Myo digestion.....                               | S-6  |
| 5. Calculation.....                                 | S-7  |
| 6. CDV formation and characterization.....          | S-10 |
| 7. Figures S1-S13.....                              | S-13 |
| 8. Tables S1-S5.....                                | S-20 |

---

\* Corresponding author.  
E-mail address: jiaqiong@jlu.edu.cn (Q. Jia)

## 1. Reagents and instrumentation

GMA, PETA,  $\gamma$ -methacryloxypropyl trimethoxysilane ( $\gamma$ -MAPS), Myo ( $\geq 95\%$ , essentially salt-free, lyophilized powder), Traut's reagent, bovine serum albumin (BSA), trypsin, 1-adamantanecarboxylic acid, and dimethylol propionic acid (DMPA) were purchased from Sigma-Aldrich Company (St, Louis, MO, USA). Polyethylene glycol (PEG 6000 and PEG 20000), ethylene diamine tetraacetic acid (EDTA), and  $\beta$ -CD were acquired from Aladdin Reagent Company (Shanghai, China). Peptide-N-glycosidase (PNGase F), Traut's reagent, and octapeptide were from Biomiga Company (Shanghai, China). Sodium hydroxide (NaOH), hydrochloric acid (HCl), methanol (MeOH), acetonitrile (ACN), ethanol, acetone, trichloromethane ( $\text{CHCl}_3$ ), phosphate buffered saline (PBS, pH 7.4), trifluoroacetic acid (TFA), formic acid (FA), and ammonium bicarbonate ( $\text{NH}_4\text{HCO}_3$ ) were obtained from Tianjin Guangfu Fine Chemical Research Institute (Tianjin, China). Water was purified by a Milli-Q system (Millipore, MA, USA). GMA and PETA were distilled under vacuum before use. AIBN was purified by recrystallization from ethanol and dried under vacuum at room temperature prior to use. All the other reagents were used as received.

Fused-silica capillaries (530  $\mu\text{m}$  i. d.) were purchased from Yongnian Optical Fiber Factory (Handan, China). A precise syringe pump (GT0785, USA) was used to push liquids through monoliths. A KQ-200KDE digital ultrasonic cleaner was obtained from Kunshan Ultrasonic Instruments Co., Ltd. (Jiangsu, China). An SC-3164 low speed centrifuge was from Anhui USTC Zonkia Scientific Instruments Co., Ltd., China. pH of sample solutions was determined with a PHS-3C digital pH meter (Shanghai Rex Instruments Factory, China).

The solid-state  $^1\text{H}$  NMR and  $^{13}\text{C}$  NMR spectra were obtained with an Infinityplus-400 spectrometer (Varian, USA). Mass spectra were obtained on a Bruker Esquire 3000 plus mass spectrometer (Bruker-Franzen Analytik GmbH Bremen, Germany) equipped with an ESI

interface and an ion trap analyzer. The static surface tension ( $\gamma$ ) and contact angle (CA) were measured with an OCA20 apparatus (DataPhysics, Germany) at a saturated humidity with the temperature controlled by a superthermostat (Julabo F25, Germany).

DLS measurement was prepared by filtering solution through a 0.45  $\mu\text{m}$  Millipore filter into a clean scintillation vial. The samples were examined on a laser light scattering spectrometer (BI-200SM) equipped with a Zetasizer Nano ZS instrument using a He-Ne laser at the wavelength of 632 nm (Malvern, UK) and a scattering angle of  $90^\circ$ . The concentration of CDV was 0.05 mM and pH was in the range of 4.0–9.0. In addition, the hydrodynamic diameter ( $D_h$ ) of CDV was determined in aqueous solutions by DLS.

SAXS spectra were determined using the SAXS beam line of the National Synchrotron Light Laboratory (LNLS, Campinas, Brazil). A position sensitive X-ray detector and a multichannel analyzer were used to determine the SAXS intensity. The X-ray scattering intensity,  $I(q)$ , was determined as a function of the scattering vector ( $q$ ) which was given by  $q = (4\pi/\lambda)\sin(\theta)$ , where  $\lambda$  is the X-ray wavelength and  $\theta$  is half the scattering angle.<sup>1</sup>

SEM images were acquired on an S4800 ESEM microscope (Hitachi, Japan). TEM images were recorded on an H600 electron microscope (Hitachi, Japan) with an accelerating voltage of 100 kV. The samples were diluted with ethanol and the specimens were dried at room temperature before determinations.

FT-IR spectra were obtained by a 670 FT-IR spectrometer (Thermo Nicolet, USA) in the range of 400–4000  $\text{cm}^{-1}$  and the samples were measured until the final pressure was 0.004 mbar. Ultraviolet-visible (UV-Vis) absorption spectra were recorded using a Perkin Elmer UV-Vis spectrophotometer (USA) with a 1 cm path length quartz cuvette.

Thermogravimetric (TG) curves were carried out on a Q500 thermal gravimetric analyzer (TA Instruments Inc., USA) at the heating rate of 10  $^\circ\text{C min}^{-1}$  from room

temperature to 800 °C under flowing air. An X-ray photoelectron spectrometer (XPS, ESCALAB250, Thermo Electron Corporation, USA) was used to obtain XPS data.

The pore size distribution and specific surface area of the monoliths were obtained by N<sub>2</sub> adsorption-desorption experiments with an ASAP2020 accelerated surface area and porosimetry analyzer (Micromeritics, USA). The mesopore size distribution was evaluated from the desorption branches of isotherms based on the BJH (Barrett-Joyner-Halenda) model. Specific surface area values were determined by the BET (Brunauer-Emmett-Teller) equation at  $P/P_0$  values between 0.01 and 0.98.

MALDI-TOF MS (Applied Biosystems, Foster City, CA) with a polished target was utilized for protein identifications. 7 mg mL<sup>-1</sup> CHCA dissolved in a 2:1 (v/v) mixture of ACN/H<sub>2</sub>O containing 0.1% (v/v) TFA was used as the matrix. MALDI-MS experiments were performed with constant laser intensity in the positive ion mode. All mass spectra were obtained with an accumulation of 1200 laser shot in the reflector mode with an accelerating voltage of 21.85 kV.

For UPLC-Orbitrap Tribrid Fusion MS analysis (Orbitrap Fusion Tribrid mass spectrometer, Thermo Fisher Scientific Company, USA), the spray voltage of MS was set at 2.0 kV, and the temperature of ion transfer capillary was 250 °C unless otherwise stated. The MS/MS spectra were acquired in the data-dependent mode, and the 20 most intense ions from the full scan were selected to fragmentation *via* higher-energy collisional dissociation (HCD) in the Orbitrap MS/MS. The experiments parameters were set as follows: spray voltage, 4000 V; sweep gas flow rate, 1.0 respective arbitrary units; sheath gas flow rate, 40 respective arbitrary units; aux gas flow rate, 10 respective arbitrary units; ion transfer tube temperature, 350 °C; vaporizer temperature, 200 °C; MS<sub>1</sub> detector, Orbitrap; MS<sub>1</sub> resolution, 120000; MS<sub>1</sub> scan range, 800–3500; MS<sub>1</sub> maximum injection time, 100 ms; MS<sub>2</sub> HCD collision energy, 45%; MS<sub>2</sub> detector, Orbitrap; MS<sub>2</sub> resolution, 15000; MS<sub>2</sub> maximum injection time, 35 ms;

and MS<sub>2</sub> start mass, 100. Xcalibur Qual and Quan browser software (Thermo Scientific, USA) were used for qualitative and quantitative analysis. All MS/MS spectra raw files by UHPLC-Orbitrap Fusion TMS analysis were converted to \*.mgf file by Proteome Discoverer (version 1.4) and searched against International ProteinIndex (IPI) Human 3.8 database using MASCOT (version 2.3). The search criteria were set as follows: variable modifications of methionine oxidation (+15.995 Da), N-terminal acetylation, deamidation (N). fixed modification of cysteine residues (+57.022 Da), and at most two missed tryptic cleavage sites, MS tolerances were set as 20 ppm for parent ions and 0.5 Da for fragment ions. The false positive rates (FDRs) were controlled to be less than 1% for the identification of peptides, proteins, and glycosylation sites.

## **2. Construction of poly(GMA-PETA-CDV)**

Prior to the preparation of monolithic columns, the inner wall of fused-silica capillaries (530  $\mu\text{m}$  i. d.  $\times$  40 cm) were vinylized to enable the covalent attachment as described in our previous study.<sup>2,3</sup> The inner wall was rinsed with 1 M NaOH for 30 min, water for 10 min, 1 M HCl for 30 min, water for another 10 min, and acetone for 10 min, successively. Then a solution of  $\gamma$ -MAPS/acetone (50%, v/v) was employed to modify the inner wall at 55 °C for 14 h. Afterward, the polymerization solution consisting GMA (480 mg), PETA (320 mg), PEG 20000 (160 mg), PEG 6000 (980 mg), H<sub>2</sub>O (60 mg), AIBN (1% with respect to monomer, w/w), DMPA (1% with respect to monomer, w/w), and SH-CDV with different amounts was purged with N<sub>2</sub> for 10 min, ultrasonicated for 15 min to remove the dissolved O<sub>2</sub>, and then inlet into the as-pretreated capillary. For the polymerization, the freshly synthesized SH-CDV was dispersed in the polymerization mixture and copolymerized with the monomer (GMA) *via* a thiol-epoxy click polymerization reaction by using DMPA and AIBN as the initiator.

Subsequently, the capillary was sealed by silicon rubbers at both ends and heated to 60 °C under UV radiation conditions for 24 h. Finally, the obtained monolith was washed with MeOH to remove the unreacted component and porogenic solvent overnight before use.

### **3. Sample preparation**

Human blood samples from volunteers were obtained from China-Japan Hospital of Jilin University (Changchun, China). The collected serum samples were stored in separate glass tubes containing EDTA as an anticoagulant additive and then centrifuged (within 2 h of collection) at 4000 rpm for 10 min at 5 °C. The blood samples were subsequently stored at –20 °C and filtered by 0.22 µm film before use.

A blank blood sample (1 mL) was prepared by removing any potential Myo glycopeptides using the PMME process. The as-obtained residual blood sample was used as the blank serum sample. A series of samples were spiked with Myo in the concentration range of 0–5 pmol. For recovery tests, the samples were spiked with Myo with concentrations of 0.01 and 0.1 pmol, respectively. All samples were degassed and homogenized with an ultrasonic bath prior to analysis. For real sample analysis, human serum treated with trypsin digest was introduced into the PMME procedure.<sup>4</sup>

### **4. Myo digestion**

1 mg Myo lyophilized powder was denatured by 1 mL PBS solution (50 mM, pH 7.4) and stored at –20 °C before use. Low concentration Myo solutions were prepared by diluting the stock solution with the above PBS solution to the final concentration and denatured at 100 °C for 15 min. Trypsin was added to the Myo solution at an enzyme/substrate mass ratio

of 1:30 and incubated at 37 °C overnight. Finally, FA (98%, v/v) was added to adjust pH to 2.0–3.0 and the reaction was terminated.

## 5. Calculation

(1) Myo-Loaded SH-CDV: Myo-loaded SH-CDVs were prepared as follows. A certain amount of Myo was added to a solution at pH 7.4, and then water was added until the volume of the solution reached 25 mL. The ultimate concentration of Myo was 0.01  $\mu\text{g mL}^{-1}$ . Subsequently, the prepared Myo-loaded SH-CDV was purified by ultracentrifugation (10000 rpm for 2 min) and dialyzed (molecular weight cut off of 3500) in water for several times until the water outside the dialysis tube exhibited negligible Myo absorbance. The Myo encapsulation and loading capacities were calculated by the following equations:<sup>5</sup>

$$\text{Encapsulation efficiency (\%)} = M_{\text{Myo-loaded}} / M_{\text{Myo}} \quad (1)$$

$$\text{Loading capacity (\%)} = M_{\text{Myo-loaded}} / M_{\text{CDVs}} \quad (2)$$

where  $M_{\text{Myo-loaded}}$ ,  $M_{\text{Myo}}$ , and  $M_{\text{CDVs}}$  are masses of Myo encapsulated in vesicles, added Myo, and Myo-loaded SH-CDV (mg), respectively. The mass of Myo was measured by a UV spectrophotometer at 214 nm and calculated relative to a standard calibration curve in water.

(2) Controllable Myo release: The release efficiency was monitored by the observed absorbance at 214 nm from the time-dependent UV-Vis spectroscopy. Trace amounts of HCl were added to decrease the pH values. The Myo release rate was calculated by the following equation:<sup>6</sup>

$$\text{Release rate (\%)} = 1 - (C_0 - C_T) / (C_0 - C_M) \quad (3)$$

where  $C_M$  is the concentration of Myo in solution after adding SH-CDV and measured at pH 7.4,  $C_T$  is the concentration of Myo measured at pH 5.0, and  $C_0$  is the initial concentration of Myo in solution ( $\text{mg mL}^{-1}$ ). The pH treatment time for determination is 1 min for every pH

point.

(3) Permeability: The permeability of monoliths was described by the back pressure drop of the monolithic column and determined on a Waters 2489 liquid chromatography system equipped with Waters 1525 binary pumps (Waters, USA) at different flow rates using 70% ACN + 0.1% FA as the mobile phase. The permeability was calculated according to Darcy's Law:<sup>7</sup>

$$B_0 = \frac{F\eta L}{\pi r^2 \Delta P} \quad (4)$$

where  $F$  is the linear velocity of the eluent,  $\eta$  is the dynamic viscosity of the mobile phase (0.580 cP),  $L$  is the effective length of the column ( $\mu\text{m}$ ),  $r$  is the inner radius of the column ( $\mu\text{m}$ ),  $\Delta P$  is the pressure drop across the column (bar), and  $B_0$  is permeability ( $\text{m}^2$ ). The value of  $B_0$  can be used as an index for evaluating the permeability quality of monoliths.

(4) Swelling behavior: The poly(GMA-PETA-CDV) monolithic column was tested upon their swelling behavior in DMSO, known as an excellent solvent for organic polymers. The swelling propensity ( $SP$ ) factor which was introduced by Nevejans and Verzele.<sup>8</sup>

$$SP = [p_{(\text{DMSO})} - p_{(\text{H}_2\text{O})}] / p_{(\text{H}_2\text{O})} \quad (5)$$

where  $p$  is defined as the ratio of back pressure to solvent viscosity ( $p = P/\eta$ ).  $SP = 0$  implies that the material has a property of non-swelling and the higher is  $SP$  factor, the more the material swells.

(5) Dynamic binding capacity ( $DBC$ ):  $DBC$  during the open-loop experiments was determined by the breakthrough area integration method and by the measurement of the quantity of the eluted component.<sup>33</sup> To determine  $DBC$  of poly(GMA-PETA-CDV) monolith for glycopeptides, frontal analysis of the monolith was carried out with  $0.1 \text{ mg mL}^{-1}$  Myo and  $0.1 \text{ mg mL}^{-1}$  BSA dissolved in PBS with pH at 5.0 and 7.4, respectively.  $DBC$  was calculated by the following equation:<sup>9</sup>



$$DBC = (V_B - V_0) \times C / m \quad (6)$$

where  $V_B$  is 10% breakthrough volume (mL),  $V_0$  is the dead volume (mL),  $C$  is the protein concentration (mg mL<sup>-1</sup>), and  $m$  is the weight of monolithic rod (mg). In brief, the monolith was equilibrated with loading buffer at pH 5.0. A sample solution containing 0.1 mg mL<sup>-1</sup> Myo or BSA in PBS was pumped through the column at a flow rate of 50  $\mu$ L min<sup>-1</sup>. The dynamic breakthrough curve was recorded in a flow cell located in a UV spectrometer at 214 nm until 100% breakthrough was reached.

(6) Hemocompatibility assessment: Hemolysis ratio was measured to investigate the blood compatibility properties of poly(GMA-PETA-CDV) monolith. The value of hemolysis ratio was calculated according to the equation:

$$R_H = (A_t - A_{nc}) / (A_{pc} - A_{nc}) \quad (7)$$

where  $A_t$  is the absorbance of the sample at 214 nm,  $A_{pc}$  and  $A_{nc}$  are the absorbance of the positive and negative controls of purified water and normal saline (9%,  $m/m$ ), respectively.  $R_H$  of poly(GMA-PETA-CDV) monolith was determined to be 0.45%, which was lower than the clinic limit, 5%. Such results implied that the materials conformed to the requirement of biomaterials.

(7) Matrix effect: Matrix effect ( $ME$ ) of the PMME-MS method was investigated since it may have significant interference on the analysis process and affect the accuracy of analytical results.  $ME$  during validation of analytical methods in biological fluids can be examined as the following equation:

$$ME = (A_{MS} - A_M) / A_S \quad (8)$$

where  $A_S$  is the mass peak area of the standard solution (1 pmol Myo tryptic digests) in 70% ACN + 0.1% FA.  $A_M$  and  $A_{MS}$  are the mass peak areas of blank human blood sample and 1 pmol Myo tryptic digests in blank human blood sample obtained after the PMME procedure, respectively. If the  $ME$  value is above 1.0, there is signal enhancement, but if it is below 1.0,

there is signal suppression. If  $ME$  equals to 1.0, there is no matrix effect. In this study,  $ME$  values were determined (in triplicate) to be in the range of  $(0.87\text{--}1.18) \pm 0.02$ , indicating that the matrix effects of human blood samples were low and could be ignored.<sup>10</sup>

## 6. SH-CDV formation and characterization

When **1** was dissolved in water,  $\gamma$  was measured as a function of the concentration of **1** ( $C$ ) to determine its critical micelle concentration (CMC) in water (**Figure S2a**). There were two linear segments in the curve of  $\gamma$  versus  $C$  and a sudden reduction in the slope could be observed, implying that CMC is  $\sim 1.0 \times 10^{-4}$  M.<sup>6</sup>

**Figure S2b** showed the autocorrelation functions and the average relaxation time ( $\tau$ ) calculated from the autocorrelation functions investigated with DLS measurements at pH 7.4 and 5.0, respectively. At pH 7.4,  $\tau$  was ca. 0.23 ms, which was close to the value for CDVs and corresponded to a spherical object with a diameter of  $\sim 90$  nm (**Figure S2c**). On the other hand,  $\tau$  was ca. 0.33 ms at pH 5.0 corresponding to an object with a mean effective hydrodynamic diameter ( $D_h$ ) of 100 nm, which could be a fiber in dimension of  $8 \text{ nm} \times 400 \text{ nm}$ .  $D_h$  could be calculated according to  $D_h = L / \ln(L/d)$ , where  $L$  and  $d$  are the length and diameter of the fiber (nm), respectively.

**Figure S3a** showed experimental SAXS intensities and fitting results of SH-CDV, indicating that the scattered peak signals were gradually weakened. The size of SH-CDV microsphere could be calculated by scattering peak of  $q$  value. Combined with the radical excess electron density of fitting result in **Figure S3b**, indicating SH-CDV has homogeneous in density with a narrow size distribution. The size was calculated to be approximately 110 nm, which was basically consistent with DLS measurements.

- (1) Mansur, H. S.; Orefice, R. L.; Mansur, A. A. P. Characterization of Poly(vinyl alcohol)/poly(ethylene glycol) Hydrogels and PVA-derived Hybrids by Small-angle X-ray Scattering and FTIR Spectroscopy. *Polymer* **2004**, *45*, 7193–7202.
- (2) Zheng, H. J.; Zhu, T. G.; Li, X. Q.; Ma, J. T.; Jia, Q. Peanut Agglutinin and  $\beta$ -Cyclodextrin Functionalized Polymer Monolith: Microextraction of IgG Galactosylation Coupled with Online MS Detection. *Anal. Chim. Acta* **2017**, *983*, 141–148.
- (3) Zheng, H. J.; Ma, J. T.; Feng, W.; Jia, Q. Specific Enrichment of Glycoproteins with Polymer Monolith Functionalized with Glycocluster Grafted  $\beta$ -Cyclodextrin. *J. Chromatogr. A* **2017**, *1512*, 88–97.
- (4) Zhang, H.; Lu, H. Y.; Huang, H. C.; Liu, J. C.; Fang, X. W.; Yuan, B. F.; Feng, Y. Q.; Chen, H. W. Quantification of 1-Hydroxypyrene in Undiluted Human Urine Samples Using Magnetic Solid-phase Extraction Coupled with Internal Extractive Electrospray Ionization Mass Spectrometry. *Anal. Chim. Acta* **2016**, *926*, 72–78.
- (5) Wang, K.; Guo, D. S.; Wang, X.; Liu, Y. Multistimuli Responsive Supramolecular Vesicles Based on the Recognition of p-Sulfonatocalixarene and Its Controllable Release of Doxorubicin. *ACS Nano* **2011**, *5*, 2880–2894.
- (6) Wang, J.; Chen, X.; Cui, W. L.; Yi, S. J. pH-Responsive Vesicles from Supra-Amphiphiles Based on Dynamic Imine Bond. *Colloids Surf., A* **2015**, *484*, 28–36.
- (7) Zhao, Y. Y.; Yu, L.; Guo, Z. M.; Li, X. L.; Liang, X. M. Reversed-phase Depletion Coupled with Hydrophilic Affinity Enrichment for the Selective Isolation of N-Linked Glycopeptides by Using Click OEG-CD Matrix. *Anal. Bioanal. Chem.* **2011**, *399*, 3359–3365.
- (8) Gosetti, F.; Mazzucco, E.; Zampieri, D.; Gennaro, M. C. Signal Suppression/enhancement in High-performance Liquid Chromatography Tandem Mass Spectrometry. *J. Chromatogr. A* **2010**, *1217*, 3929–3937.
- (9) Boto, R. E. F.; Anyanwu, U.; Sousa, F.; Almeida, P.; Queiroz, J. A. Thiocarbocyanine as

Ligand in Dye-affinity Chromatography for Protein Purification. II. Dynamic Binding Capacity Using Lysozyme as a Model. *Biomed. Chromatogr.* **2009**, *23*, 987–993.

(10) Ma, J. F.; Liang, Z. Qiao, X. Q.; Deng, Q. L.; Tao, D. Y.; Zhang, L. H.; Zhang, Y. K. Organic-inorganic Hybrid Silica Monolith Based Immobilized Trypsin Reactor with High Enzymatic Activity. *Anal. Chem.* **2008**, *80*, 2949–2956.

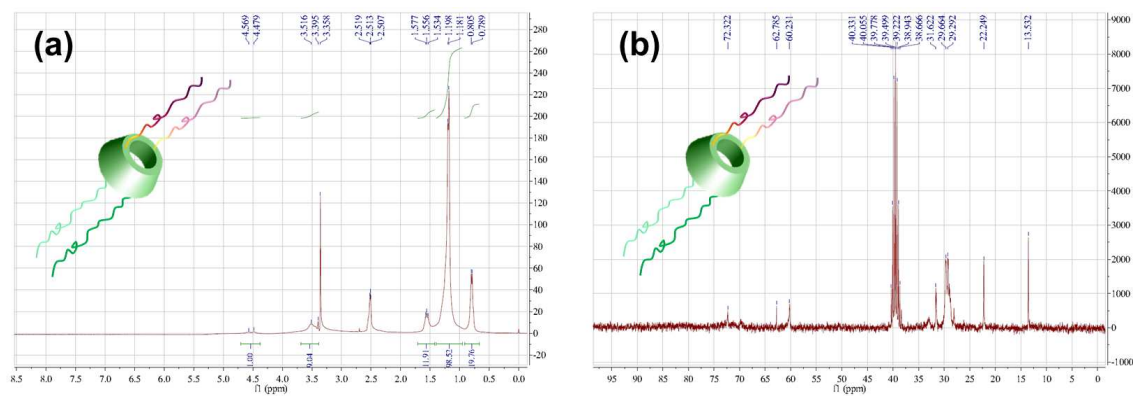

**Figure S1.** (a)  $^1\text{H}$  NMR and (b)  $^{13}\text{C}$  NMR of compound **1**.

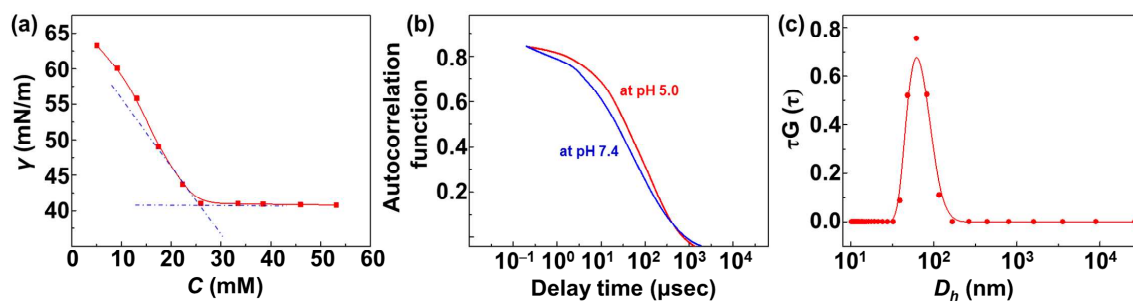

**Figure S2.** (a) Surface tension of **1**; (b) autocorrelation functions from DLS measurements performed on mixture of **1** (1 mM) and **2** (0.5 mM) at pH 7.4 and 5.0; and (c)  $D_h$  distribution determined by DLS for CDV at pH 7.4.

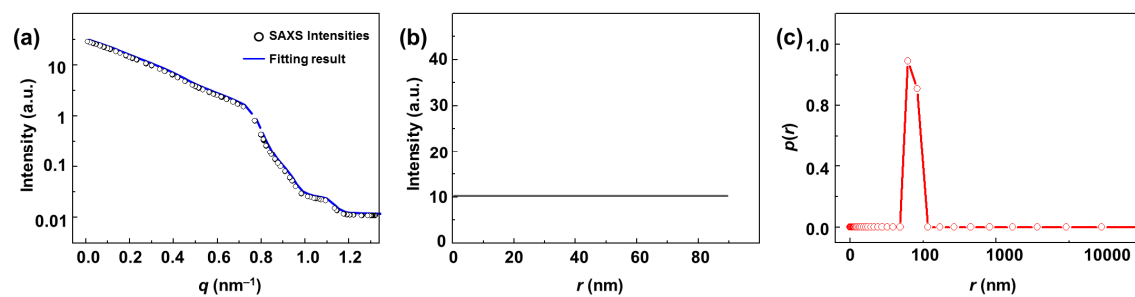

**Figure S3.** (a) Experimental SAXS intensities and fitting results of SH-CDV, (b) radical excess electron density of fitting result, and (c)  $r$  distribution determined by SAXS.

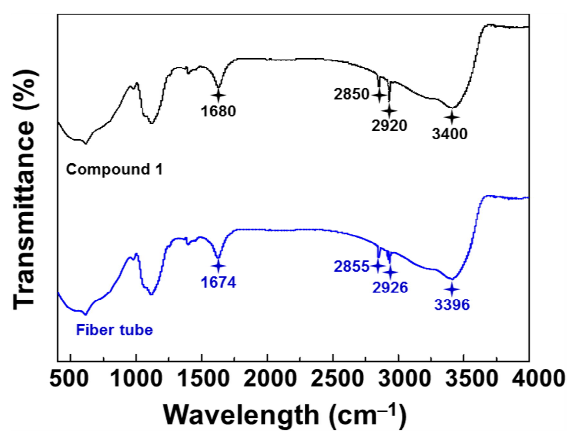

**Figure S4.** FT-IR spectra of compound **1** and fiber tube.

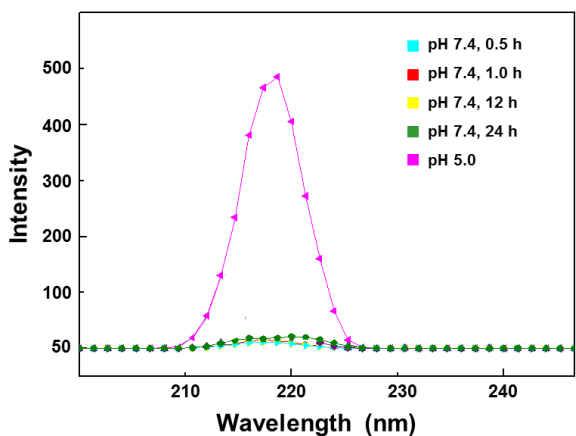

**Figure S5.** UV spectra of Myo encapsulated in a  $1.0 \times 10^{-4}$  M vesicular solution at pH 5.0 and at different aging times (0.5-24 h) when the pH was 7.4.

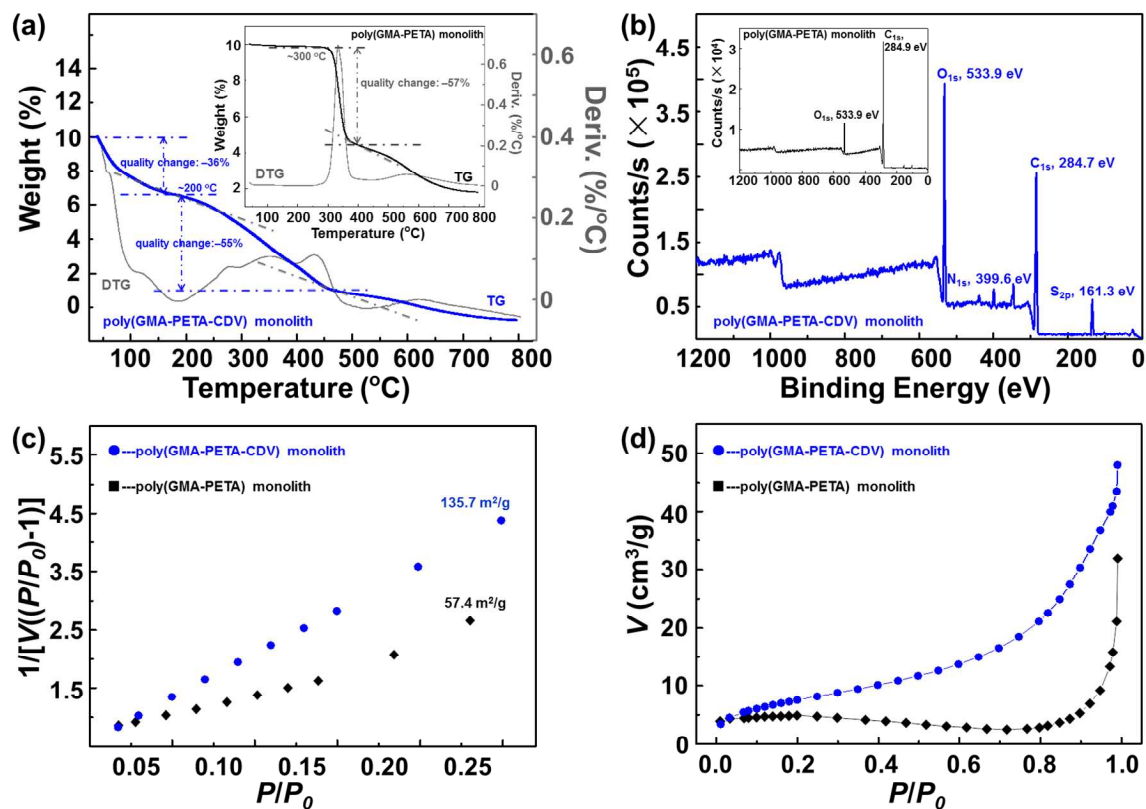

**Figure S6.** Characterization of poly(GMA-PETA) and poly(GMA-PETA-CDV) monoliths: (a) TG-DTG curves, (b) XPS spectra, (c) specific surface area, and (d) pore diameter distribution.

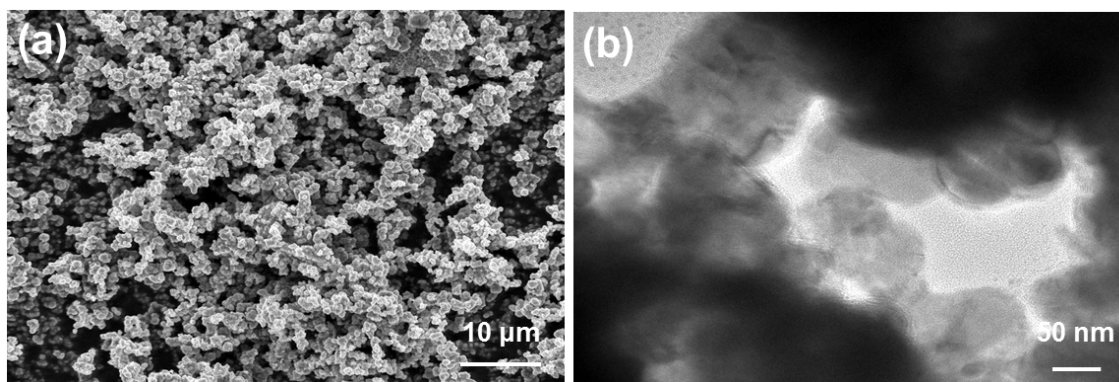

**Figure S7.** (a) SEM and (b) TEM images of poly(GMA-PETA-CDV) monolith after adjusting pH back to 7.4.

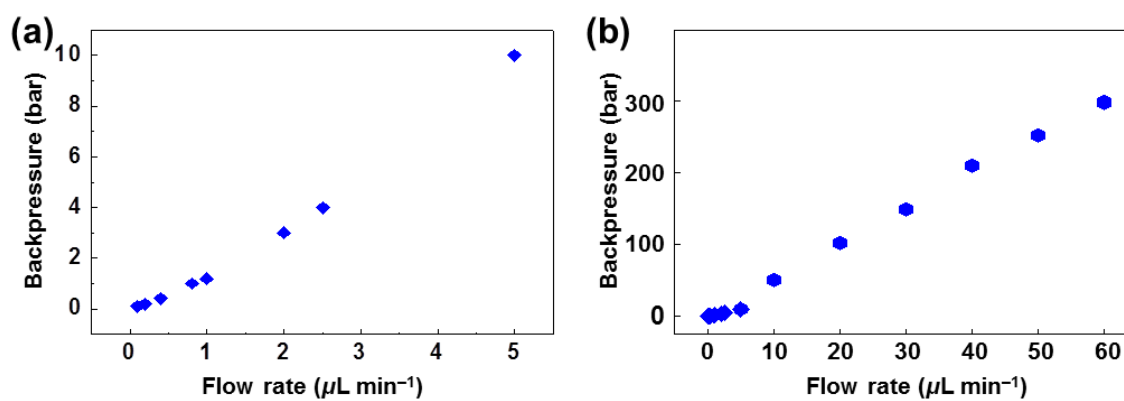

**Figure S8.** Relationship between flow rate and back pressure. Condition: 530  $\mu\text{m}$  i. d., 3 cm length; room temperature; flow rate: (a) 0.1–5  $\mu\text{L min}^{-1}$  and (b) 0.1–60  $\mu\text{L min}^{-1}$ .



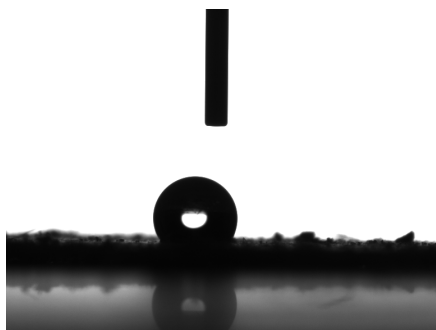

**Figure S9.** CA of poly(GMA-PETA-CDV) monolith (pH 5.0).

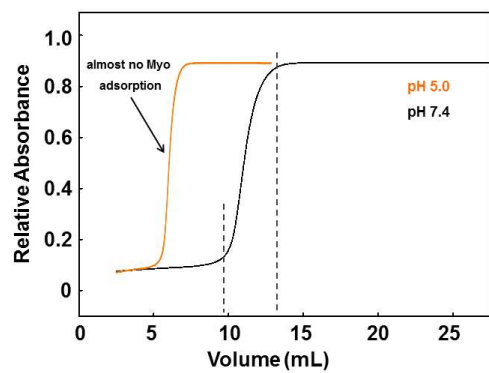

**Figure S10.** Breakthrough curves of Myo on poly(GMA-PETA-CDV) monolith.

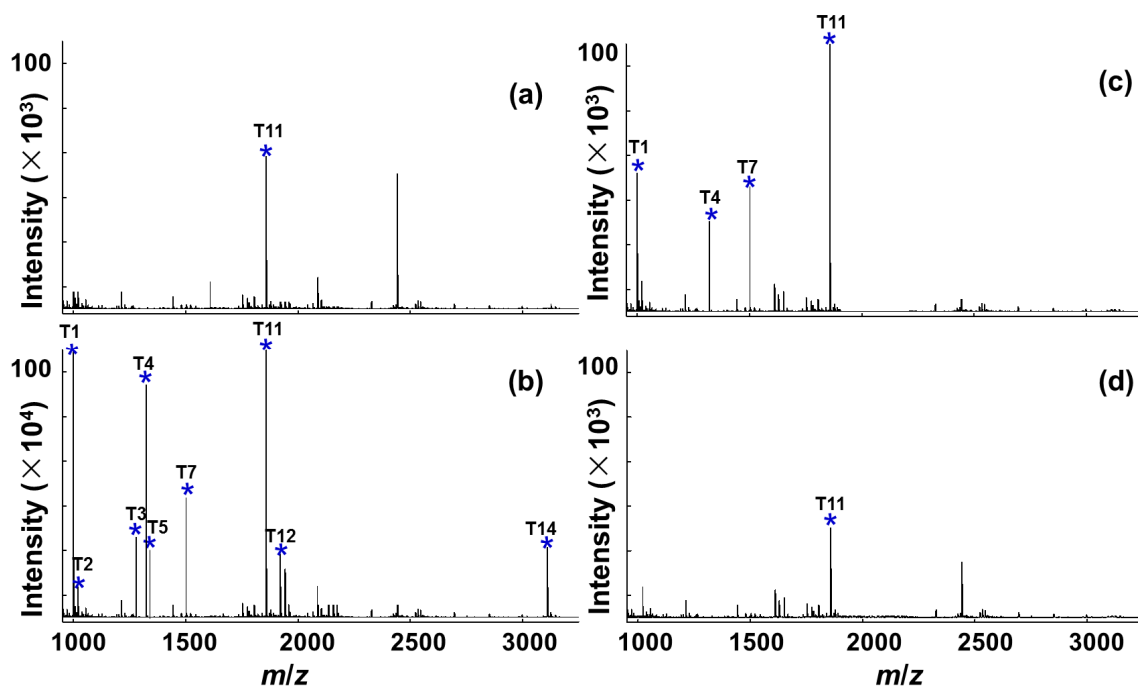

**Figure S11.** MALDI-MS spectra of Myo tryptic digests. (a) Enrichment by poly(GMA-PETA) monolith (10 fmol); and enrichment by poly(GMA-PETA-CDV) monolith: (b) 0.5 fmol, (c) 0.1 fmol, and (d) 0.05 fmol. Glycopeptides were marked.

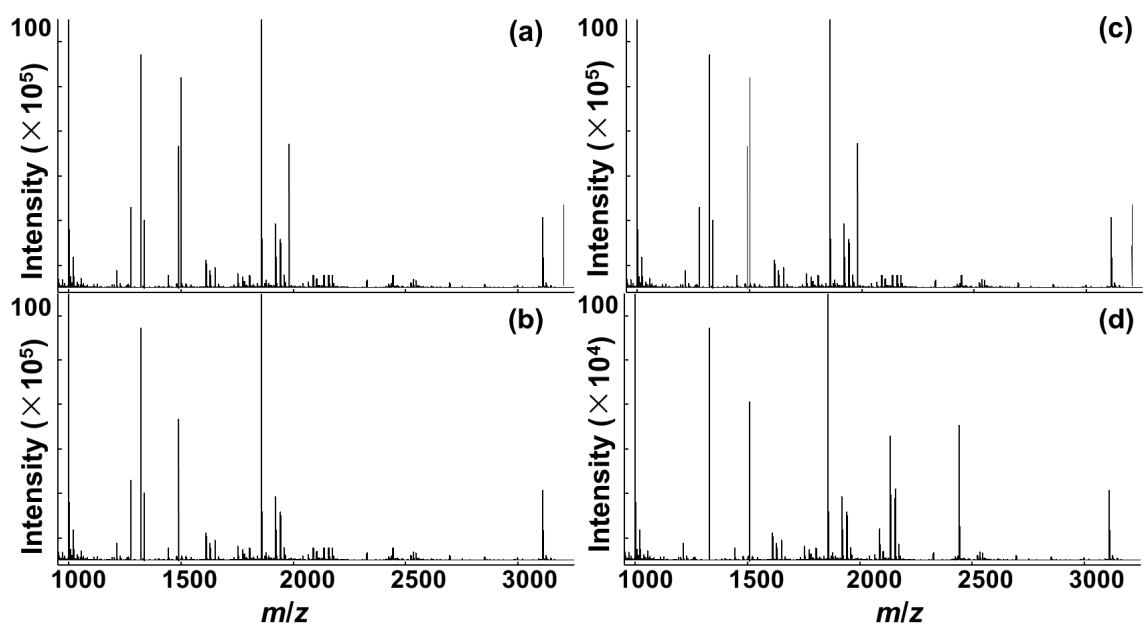

**Figure S12.** MALDI-MS spectra of Myo tryptic digests enriched by poly(GMA-PETA-CDV) monolith. (a) For the first time, (b) after 10 times, (c) after 50 times, and (d) after 90 times.

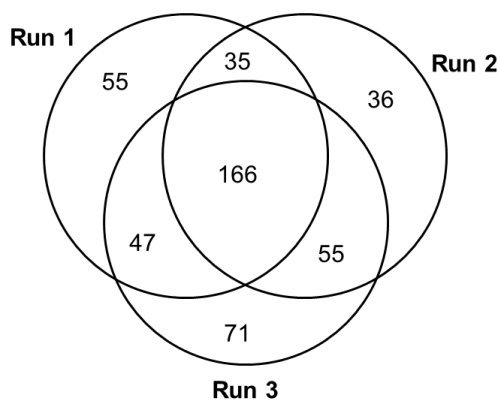

**Figure S13.** Overlap of the glycosylation sites identified by glycoproteome analysis of 1  $\mu$ L human blood from UHPLC-Orbitrap Fusion TMS analyses.

**Table S1** Recipes of monoliths (Polymerization time of 24 h and polymerization temperature of 60 °C under UV radiation conditions in all cases).

| Column | (Monomer +<br>Crosslinker)<br>/ Porogen | Monomer<br>/Crossliner | PEG 20000<br>(wt %) | PEG 6000<br>(wt %) | H <sub>2</sub> O | <i>SP</i> | Permeability<br>( $\times 10^{-14}$ m <sup>2</sup> ) |
|--------|-----------------------------------------|------------------------|---------------------|--------------------|------------------|-----------|------------------------------------------------------|
| 1      | 5 / 5                                   | 6 / 4                  | 35                  | 60                 | 5                | 0.54      | 0                                                    |
| 2      | 2 / 3                                   | 6 / 4                  | 25                  | 70                 | 5                | 0.50      | 1.14                                                 |
| 3      | 2 / 3                                   | 6 / 4                  | 15                  | 80                 | 5                | 0.49      | 3.34                                                 |
| 4      | 2 / 3                                   | 9 / 1                  | 25                  | 70                 | 5                | 0.47      | 6.27                                                 |
| 5      | 2 / 3                                   | 9 / 1                  | 20                  | 75                 | 5                | 0.36      | 7.98                                                 |
| 6      | 2 / 3                                   | 9 / 1                  | 13                  | 82                 | 5                | 0.32      | 10.89                                                |

**Table S2** Molecular masses and amino acid sequence of Myo glycopeptides after enrichment.

| Peak | <i>m/z</i> | Amino acid sequence                  |
|------|------------|--------------------------------------|
| T1   | 942.05     | K.YKELGFQG.–                         |
| T2   | 1087.28    | K.HLKTEAEMK.A                        |
| T3   | 1272.43    | R.LFTGHPETLEK.F                      |
| T4   | 1361.57    | K.ALELFRNDIAAK.Y                     |
| T5   | 1379.67    | K.HGTVVLTALGGILK.K                   |
| T6   | 1503.62    | K.HPGDFGADAQGAMTK.A                  |
| T7   | 1507.85    | K.HGTVVLTALGGILKK.K                  |
| T8   | 1607.79    | K.VEADIAGHGQEVLR.L                   |
| T9   | 1662.87    | R.LFTGHPETLEKFDK.F                   |
| T10  | 1817.00    | –.GLSDGEWQQVLNVWGK.V                 |
| T11  | 1887.13    | K.YNEFISDAIIHVLHSHK.H                |
| T12  | 1938.22    | R.LFTGHPETLEKFDKFK.H                 |
| T13  | 1983.22    | K.KGHHEAELKPLAQSHATK.H               |
| T14  | 3371.73    | K.YNEFISDAIIHVLHSHKHPGDFGADAQGAMTK.A |
| T15  | 3405.77    | –.GLSDGEWQQVLNVWGKVEADIAGHGQEVLR.L   |

**Table S3** Comparison of different sample preconcentration and detection methods for the determination of Myo tryptic digests.

| Method       | Material                          | Detection method             | LOD        | Sample      | Ref.      |
|--------------|-----------------------------------|------------------------------|------------|-------------|-----------|
| SPME         | organic-inorganic hybrid monolith | $\mu$ HPLC-ESI-MS/MS         | 10 fmol    | E. coli     | [33]      |
| Immunosensor | AuNP/Br-Py/GCE                    | immunoassay                  | 6.29 ng/mL | Blood serum | [27]      |
| SPE          | magnetic microspheres             | cIEF <sup>a</sup> -ESI-MS/MS | 70 fmol    | Human serum | [34]      |
| SPME         | poly(EHMA-EDMA) monolith          | LC-MALDI-MS                  | 10 fmol    | -           | [35]      |
| SPE          | proPac SAX-10 column              | HPLC-ESI-MS                  | 460 fg/mL  | Human serum | [36]      |
| PMME         | MAA-silica hybrid monolith        | nano-RPLC-ESI/MS/MS          | -          | E. coli     | [37]      |
| PMME         | poly(GMA-PETA-CDV) monolith       | Orbitrap-MS                  | 0.05 fmol  | Human blood | This work |

cIEF: capillary isoelectric focusing

**Table S4** Comparison of different CD-based materials for glycoprotein analysis.

| Material                              | Detection method  | Glycoprotein | LOD       | Sample      | Ref.      |
|---------------------------------------|-------------------|--------------|-----------|-------------|-----------|
| CD-MOFs                               | MALDI MS          | IgG          | 67 fmol   | Mouse liver | [38]      |
| $\beta$ -CD-conjugated PDMS           | fluoroimmunoassay | Myo          | 1.0 ng/mL | -           | [26]      |
| poly(MMA-HEMA-biotin-Lys-CD) monolith | MADLI MS          | Plg          | 1.0 fmol  | Human serum | [39]      |
| poly(HEMA-EDMA-PNA-CD) monolith       | Orbitrap MS       | IgG          | 0.5 fmol  | Human serum | [20]      |
| poly(HEMA-PETA-glycoCD) monolith      | MADLI MS          | HRP          | 0.5 pmol  | Human serum | [21]      |
| poly(GMA-PETA-CDV) monolith           | Orbitrap MS       | Myo          | 0.1 fmol  | Human blood | This work |

**Table S5.** List of identified glycoproteins from 1  $\mu$ L human blood sample captured by poly(GMA-PETA-CDV) monolith.

| No. | Protein     | Description                                                                   | Sequence                                                                                                                                                                                             |
|-----|-------------|-------------------------------------------------------------------------------|------------------------------------------------------------------------------------------------------------------------------------------------------------------------------------------------------|
| 1   | IPI00123704 | Atp1b2 Sodium/potassium-transporting ATPase subunit beta-2                    | K.KFHVN*YTQPLVAVK.F<br>R.VINFYAGAN*QSM#NVTCVGKR.D<br>K.FLEPYN*DSIQAQK.N<br>R.VINFYAGAN*QSM#N* C G .R<br>K.FLN*VTPNVEVNVECR.I<br>K.TENLDVIVN*ISDTESWGQHVQK.L<br>R.DEDAENLGHFVM#FPAN*GSIDLM#YFPYYGKK.F |
| 2   | IPI00122971 | Ncam1 Isoform 1 of Neural cell adhesion molecule 1                            | R.TSTRN*ISSEEK.T<br>R.DGQLLPSSN*YSNIK.I                                                                                                                                                              |
| 3   | IPI00022431 | AHSG cDNA<br>FLJ55606, highly similar to Alpha-2-HS-glycoprotein              | VCQDCPLLAPLNDTR<br>AALAAFNAQNNGSNFQLEEISR                                                                                                                                                            |
| 4   | IPI00129158 | Sirpa Isoform 1 of Tyrosine-protein phosphatase non-receptor type substrate 1 | R.VTN*VSDATKR.N<br>K.VTQQSPTSM#NQVN*LTCL.A<br>R.ISN*VTPEDAGTYVCVK.F<br>K.NTDGTYN*YTSFLVN*SSAHR.E<br>K.NTDGTYN*YTSFLVN*SSAHR.E                                                                        |
| 5   | IPI00553177 | SERPINA1 Isoform 1 of Alpha-1-antitrypsin                                     | YLGNATAIFFLPDEGK<br>ADTHDEILEGLNFNLTETPEAQIHEGFQELLR<br>QLAHQSNSTNIFFSPVSIATAFAMLSLGTK                                                                                                               |
| 6   | IPI00123058 | Cntn1 Contactin-1                                                             | R.GKAN*STGTLVITNPTR.I<br>K.GTEWLVN*SSR.I<br>R.YTCTAQTIVDN*SSASADLVVR.G<br>R.GN*YSCFVSSPSITK.S                                                                                                        |
| 7   | IPI00022429 | ORM1 Alpha-1-acid glycoprotein 1                                              | ENGTISR<br>NEEYNK<br>QDQCIYNTTYLNVQR                                                                                                                                                                 |
| 8   | IPI00118385 | Grin1 Isoform 1 of Glutamate [NMDA] receptor subunit zeta-1                   | K.KVICTGPN*DTSPGSPR.H<br>R.KLVQVGIYN*GTHVIPNDRK.I<br>R.KDSPWKQN*VLSILK.S                                                                                                                             |
| 9   | IPI00128360 | Ntrk2 Isoform GP145-TRKB of BDNF/NT-3 growth factors receptor                 | K.HM#N*ETSHTQGSLR.I<br>R.ITN*ISSDDSGK.Q                                                                                                                                                              |



|    |             |                                                                                     |                                                                                                                                          |
|----|-------------|-------------------------------------------------------------------------------------|------------------------------------------------------------------------------------------------------------------------------------------|
| 10 | IPI00121550 | Atp1b1 Sodium/potassium-transporting ATPase subunit beta-1                          | R.LAAPN*LTVEEGK.S<br>R.LEPNSVDPEN*ITEILIANQK.R<br>R.VLGFKPKPPKN*ESLETYPLMMK.Y<br>K.YLQPLLA VQFTN*LTVDTEIR.V<br>R.FKLDWLGN*CSGLNDDSYGYR.E |
| 11 | IPI00127556 | Ncam2 Isoform Long of Neural cell adhesion molecule 2                               | K.SFN*ATAER.G<br>R.KM#ILEIAPTSNDNDFGRYN*CTATNR.I<br>K.LLLPAKN*TTHLK.T                                                                    |
| 12 | IPI00381178 | Es31 Isoform 1 of Liver carboxylesterase 31                                         | K.KNVN*ISYTVNDSFFPQRPQK.L<br>K.NVN*ISYTVN*DSFFPQRPQK.L                                                                                   |
| 13 | IPI00321348 | Igsf8 Immunoglobulin superfamily member 8                                           | R.GETASLLCN*ISVR.G<br>R.IGPGEPELLELCN*VSGALPPPGR.H<br>R.LQAQDSGFYECYTPSTDYQYLG*YSAK.V                                                    |
| 14 | IPI00378796 | Adam22 Isoform 19 of Disintegrin and metalloproteinase domain-containing protein 22 | R.TLN*CSGAHVK.L<br>R.EICSGN*SSQCAPNVHK.M<br>R.CLPVASFN*FSTCSSSK.A                                                                        |
| 15 | IPI00022391 | APCS Serum amyloid P-component                                                      | ESVTDHVNLIPTLEKPLQNFTLCFR                                                                                                                |
| 16 | IPI00130389 | Dpp6 Dipeptidyl aminopeptidase-like protein 6                                       | K.CEGPGVPTVTVHN*TTDK.R<br>R.NVETNN*STVLIEGK.K<br>R.AQN*VSILTLCDATTGVCTK.K<br>R.NVETN*NSTVLIEGK.K                                         |
| 17 | IPI00230013 | Cacna2d1 Isoform 2B of Voltage-dependent calcium channel subunit alpha-2/delta-1    | K.DAVNN*ITAK.G<br>K.SFSGLLDCGN*CSR.I<br>K.QSCITEQTQYFFKN*DTK.S                                                                           |
| 18 | IPI00124830 | Cd47 Isoform 2 of Leukocyte surface antigen CD47                                    | R.DAM#VGN*YTCEVTELSR.E<br>K.SYIFIYDGNKN*STTTDQN*FTSAK.I<br>K.SYIFIYDGNKN*STTTDQN*FTSAK.I                                                 |
| 19 | IPI00128360 | Ntrk2 Isoform GP145-TRKB of BDNF/NT-3 growth factors receptor                       | K.HM#N*ETSHTQGSLR.I<br>R.ITN*ISSDDSGK.Q<br>R.LAAPN*LTVEEGK.S<br>R.LEPNSVDPEN*ITEILIANQK.R                                                |
| 20 | IPI00108535 | Ceacam1 Isoform Long of Carcinoembryonic antigen-related cell adhesion molecule 1   | R.M#TLSQN*NSILR.I<br>R.TLTLLN*VTR.N<br>K.GN*TTAIDK.E                                                                                     |

|    |             |                                                                                      |                                                                                                                       |
|----|-------------|--------------------------------------------------------------------------------------|-----------------------------------------------------------------------------------------------------------------------|
| 21 | IPI00453537 | Cadm2 Isoform 2 of Cell adhesion molecule 2                                          | R.VDHESLN*ATPQVAM#QVLEIHYTPSVK.I<br>R.ELNILFLN*KTDNGTYR.C<br>R.ELNILFLN*KTDN*GTYR.C<br>K.GSQGQFPLTQN*VTVVEGGTAILTCR.V |
| 22 | IPI00109727 | Thy1 Thy-1 membrane glycoprotein                                                     | R.HEN*NTKDNSIQHEFSLTR.E<br>K.VLTLAN*FTTK.D                                                                            |
| 23 | IPI00018305 | IGFBP3 Insulin-like growth factor-binding protein 3                                  | AYLLPAPPAPGNASESEEDR<br>GLCVNASAVSR                                                                                   |
| 24 | IPI00157497 | Odz4 Isoform 3 of Teneurin-4                                                         | K.VGPYAN*TTR.Y<br>R.LNGVN*VTYSPGGHIAGIQR.G<br>R.LTN*VTFPTGQVSSFR.S                                                    |
| 25 | IPI00230289 | Slc1a2 Isoform Glt-1A of Excitatory amino acid transporter 2                         | K.KVLVAPPSEEAN*TTK.A<br>K.AVISM#LN*ETM#NEAPEETK.I                                                                     |
| 26 | IPI00227126 | Tnr Isoform 1 of Tenascin-R                                                          | K.GQCAN*GTCLCQEGYAGEDCSQRR.C<br>R.GTN*ESEASSTQFTTEIDAPK.N                                                             |
| 27 | IPI00120245 | Itgav Integrin alpha-V                                                               | K.AN*TTQPGIVEGGQVLK.C<br>R.TAADATGLQPILNQFTPAN*VSR.Q<br>R.IKTPEKN*DTGAAGQGER.S                                        |
| 28 | IPI00115762 | L1cam Neural cell adhesion molecule L1                                               | K.VPGN*QTSTTLK.L<br>K.VLLHHLDVKTN*GTGPVR.V<br>R.THN*LTNLPDLQYR.F<br>K.EQLFFN*LSDPELR.T<br>R.LLFPTN*SSSR.L             |
| 29 | IPI00122974 | Gpm6a Neuronal membrane glycoprotein M6-a                                            | R.N*TTLVEGANLCLDLR.Q                                                                                                  |
| 30 | IPI00121378 | Alcam CD166 antigen                                                                  | K.IIISPEEN*VTLTCTAENQLER.T<br>R.LSLSSEN*YTLSIANAK.I                                                                   |
| 31 | IPI00122557 | Gm4738 liver carboxylesterase 31-like isoform 1                                      | K.NVN*ISYIVNDSFFPQRPEK.L<br>K.NVN*ISYIVN*DSFFPQRPEK.L                                                                 |
| 32 | IPI00409148 | Hp Haptoglobin                                                                       | K.NLFLN*HSETASAK.D<br>K.VVLHPN*HSVVDIGLIK.L                                                                           |
| 33 | IPI00316469 | Stt3b Dolichyl-diphosphooligo saccharide--protein glycosyl transferase subunit STT3B | K.AM#SSN*ETAAYK.I<br>R.TTLVDNNTWN*NSHIALVGK.A                                                                         |
| 34 | IPI00113869 | Bsg Isoform 2 of Basigin                                                             | K.TQLTCSLN*SSGVDIVGHR.W                                                                                               |
| 35 | IPI00230151 | Mag Isoform S-MAG of Myelin-associated glycoprotein                                  | R.ATAFN*LSVEFAPIILLESCHAAAR.D                                                                                         |

|    |             |                                                                            |                                                                                                                                                                                                                                                                                                                                                                                                                                                                                                                                                                                                                                                                                                                                                                                                                                                   |
|----|-------------|----------------------------------------------------------------------------|---------------------------------------------------------------------------------------------------------------------------------------------------------------------------------------------------------------------------------------------------------------------------------------------------------------------------------------------------------------------------------------------------------------------------------------------------------------------------------------------------------------------------------------------------------------------------------------------------------------------------------------------------------------------------------------------------------------------------------------------------------------------------------------------------------------------------------------------------|
| 36 | IPI00111960 | Gaa Lysosomal alpha-glucosidase                                            | R.N*VTVN*ETEREFVYSER.S<br>R.N*VTVN*ETEREFVYSER.S<br>R.GVFITN*ETGQPLIGK.V<br>R.LEN*LSSTESGYTATLTR.T<br>ENISDPTSPLR<br>IIVPLNNRENISDPTSPLR<br>K.TVVAPSTEGGLN*LTSTFLR.K<br>R.IVSPEPGGAAGPN*LTCTR.W<br>R.LLAN*SSM#LGEGQVLR.S<br>K.VGPYAN*TTR.Y<br>R.LNGVN*VTYSPGGHIAGIQR.G<br>R.LTN*VTFPTGQVSSFR.S<br>K.DLQDLSIFITN*VTYN*HSGDYECHVYR.L<br>K.DLQDLSIFITN*VTYN*HSGDYECHVYR.L<br>R.VVWN*GSR.G<br>R.LLFFDNYEHN*TSVVK.K<br>R.ALPGGTDN*ASAASAAGGSGPQR.S<br>K.SPQSN*GTSGVEQICVDVR.Q<br>K.LGVTN*ASLVLFKR.V<br>K.QM#VENFSPN*QTK.F<br>K.HNFRPGTDFVVEYIDSN*HTK.K<br>K.YYHGELSYLN*VTRK.A<br>R.GTDN*ITVR.Q<br>R.EASN*HSSGAGLVQINK.S<br>R.DCVSCQN*VSR.G<br>K.DTLSIN*ATNIK.H<br>R.ALVN*FTR.S<br>R.SLTQGSLIVGNLAPVN*GTSQGK.F<br>R.AFNISPN*DTSSGSCGINLVTLK.V<br>R.GYLLTLN*FTK.N<br>K.INN*STNEGM#NVK.K<br>R.FGTVPN*GSTER.N<br>R.AQAALDKAN*ASR.G<br>K.QSN*GSIIVISSLAGK.M |
| 37 | IPI00178926 | IGJ Immunoglobulin J chain                                                 |                                                                                                                                                                                                                                                                                                                                                                                                                                                                                                                                                                                                                                                                                                                                                                                                                                                   |
| 38 | IPI00114252 | Ptgds Prostaglandin-H2 D-isomerase                                         |                                                                                                                                                                                                                                                                                                                                                                                                                                                                                                                                                                                                                                                                                                                                                                                                                                                   |
| 39 | IPI00128454 | Sez6l2 Isoform 2 of Seizure 6-like protein 2                               |                                                                                                                                                                                                                                                                                                                                                                                                                                                                                                                                                                                                                                                                                                                                                                                                                                                   |
| 40 | IPI00157497 | Odz4 Isoform 3 of Teneurin-4                                               |                                                                                                                                                                                                                                                                                                                                                                                                                                                                                                                                                                                                                                                                                                                                                                                                                                                   |
| 41 | IPI00131062 | Scn1b Sodium channel subunit beta-1                                        |                                                                                                                                                                                                                                                                                                                                                                                                                                                                                                                                                                                                                                                                                                                                                                                                                                                   |
| 42 | IPI00114939 | Nptxr Neuronal pentraxin receptor                                          |                                                                                                                                                                                                                                                                                                                                                                                                                                                                                                                                                                                                                                                                                                                                                                                                                                                   |
| 43 | IPI00119952 | Gpm6b Isoform 1 of Neuronal membrane glycoprotein M6-b                     |                                                                                                                                                                                                                                                                                                                                                                                                                                                                                                                                                                                                                                                                                                                                                                                                                                                   |
| 44 | IPI00881077 | Lsamp Protein                                                              |                                                                                                                                                                                                                                                                                                                                                                                                                                                                                                                                                                                                                                                                                                                                                                                                                                                   |
| 45 | IPI00329927 | Nfasc Neurofascin                                                          |                                                                                                                                                                                                                                                                                                                                                                                                                                                                                                                                                                                                                                                                                                                                                                                                                                                   |
| 46 | IPI00111013 | Ctsd Cathepsin D                                                           |                                                                                                                                                                                                                                                                                                                                                                                                                                                                                                                                                                                                                                                                                                                                                                                                                                                   |
| 47 | IPI00222833 | Lsamp Limbic system -associated membrane protein                           |                                                                                                                                                                                                                                                                                                                                                                                                                                                                                                                                                                                                                                                                                                                                                                                                                                                   |
| 48 | IPI00108844 | M6pr Cation-dependent mannose-6-phosphate receptor                         |                                                                                                                                                                                                                                                                                                                                                                                                                                                                                                                                                                                                                                                                                                                                                                                                                                                   |
| 49 | IPI00121190 | Egfr Epidermal growth factor receptor                                      |                                                                                                                                                                                                                                                                                                                                                                                                                                                                                                                                                                                                                                                                                                                                                                                                                                                   |
| 50 | IPI00113824 | Hspg2 Basement membrane-specific heparan sulfate proteoglycan core protein |                                                                                                                                                                                                                                                                                                                                                                                                                                                                                                                                                                                                                                                                                                                                                                                                                                                   |
| 51 | IPI00469218 | Lamp1 Putative uncharacterized protein                                     |                                                                                                                                                                                                                                                                                                                                                                                                                                                                                                                                                                                                                                                                                                                                                                                                                                                   |
| 52 | IPI00118380 | Grin2a Glutamate [NMDA] receptor subunit epsilon-1                         |                                                                                                                                                                                                                                                                                                                                                                                                                                                                                                                                                                                                                                                                                                                                                                                                                                                   |
| 53 | IPI00109612 | Lamb2 laminin subunit beta-2 precursor                                     |                                                                                                                                                                                                                                                                                                                                                                                                                                                                                                                                                                                                                                                                                                                                                                                                                                                   |
| 54 | IPI00115599 | Hsd11b1 Corticosteroid 11-beta -dehydrogenase isozyme 1                    |                                                                                                                                                                                                                                                                                                                                                                                                                                                                                                                                                                                                                                                                                                                                                                                                                                                   |

|    |             |                                                            |                                                                                                                                                                    |
|----|-------------|------------------------------------------------------------|--------------------------------------------------------------------------------------------------------------------------------------------------------------------|
| 55 | IPI00157497 | Odz4 Isoform 3 of Teneurin-4                               | K.VGPYAN*TTR.Y<br>R.LNGVN*VTYSPGGHIAQIR.G<br>R.LTN*VTFPTGQVSSFR.S                                                                                                  |
| 56 | IPI00623371 | Bcan Brevican core protein                                 | K.TLFLFPN*QTGFPSK.Q                                                                                                                                                |
| 57 | IPI00400016 | Lamc1 Laminin subunit gamma-1                              | R.VNDN*KTAAEEALR.R<br>R.IASAVQKN*ATSTK.A<br>K.APIPTALDTN*SSK.T<br>R.ALGYEN*ATQALGR.A<br>ELLETVVNR                                                                  |
| 58 | IPI00119809 | Lgals3bp Galectin-3-binding protein                        | K.DITNLIN*NTFIR.T<br>R.HLYTTTGGETDFTN*VTSR.L<br>R.LAVTN*TTM#TGTVLK.M                                                                                               |
| 59 | IPI00022731 | APOC4 Apolipoprotein C-IV                                  | R.IEGLTN*ETYL.L<br>R.KVPSN*STETVIESDQFQPGVR.Y                                                                                                                      |
| 60 | IPI00420955 | Sort1 Isoform 1 of Sortilin                                | K.VN*LSFPSAQSLPASDTHLK.V<br>K.SLGEVN*FTATAEALQSPELCGNK.L<br>R.ESGIQN*VSTCR.F<br>K.LTYN*ESR.V                                                                       |
| 61 | IPI00108041 | Stim1 Stromal interaction molecule 1                       | K.LVEDLESFLKPYSVEEQKN*LTSCPDGAPFIQHGPDYR.A                                                                                                                         |
| 62 | IPI00119299 | Lifr Isoform 1 of Leukemia inhibitory factor receptor      | R.CNLGVAIVSM#VN*NSTTHR.G<br>R.CNLGVAIVSM#VNN*STTHR.G<br>ENGTISR<br>NEEYNK<br>QDQCIYNTTYLNVQR                                                                       |
| 63 | IPI00624663 | Pzp Uncharacterized protein                                | K.TN*SSFIQGFVDHVK.E<br>K.TVVTEAGNLLKDN*ATQEEILHYLEK.T<br>R.ASPIYELVTNN*QTQR.L                                                                                      |
| 64 | IPI00116921 | Scarb1 Scavenger receptor class B member 1                 | R.ALICN*TTN*LTAGDDGPPHR.G<br>R.ALICN*TTN*LTAGDDGPPHR.G<br>K.QMVENFSPN*QTK.F<br>K.VLTNNPYN*DSSLR.N<br>K.YTSDPN*VTSVGPSK.S<br>R.VVAVSPAN*ISR.E<br>K.RIN*YTINIM#ELK.T |
| 65 | IPI00124221 | Atp1b3 Sodium/potassium-transporting ATPase subunit beta-3 |                                                                                                                                                                    |
| 66 | IPI00109153 | Slc17a7 Vesicular glutamate transporter 1                  |                                                                                                                                                                    |
| 67 | IPI00022429 | ORM1 Alpha-1-acid glycoprotein 1                           |                                                                                                                                                                    |
| 68 | IPI00321190 | Psap Sulfated glycoprotein 1                               |                                                                                                                                                                    |
| 69 | IPI00117803 | Astn1 Isoform 2 of Astrotactin-1                           |                                                                                                                                                                    |
| 70 | IPI00128826 | Cacng8 Voltage-dependent calcium channel gamma-8 subunit   |                                                                                                                                                                    |
| 71 | IPI00930854 | Nfasc neurofascin isoform 3 precursor                      |                                                                                                                                                                    |
| 72 | IPI00229992 | Plxnb1 Plexin-B1                                           |                                                                                                                                                                    |
| 73 | IPI00136967 | Gria2 Isoform 1 of Glutamate receptor 2                    |                                                                                                                                                                    |

|     |             |                                                                              |                                                                   |
|-----|-------------|------------------------------------------------------------------------------|-------------------------------------------------------------------|
| 74  | IPI00785414 | H2-K1 MHC class Ia H2-K antigen (Fragment)                                   | K.NGN*ATLLR.T<br>R.TLLGYYN*QSK.G                                  |
| 75  | IPI00153840 | Cadm4 Cell adhesion molecule 4                                               | R. QTLFFN*GTR.A                                                   |
| 76  | IPI00022418 | FN1 Isoform 1 of<br>Fibronectin                                              | LDAPTNLQFVNETDSTVLVR<br>DQCIVDDITYNVNDTFHK<br>LDAPTNLQFVNETDSTVLV |
| 77  | IPI00121362 | F11r junctional adhesion molecule A precursor                                | R.AFM#N*SSFTIDPK.S                                                |
| 78  | IPI00139788 | Trf Serotransferrin                                                          | K.N*STLCDLCIGPLK.C                                                |
| 79  | IPI00222429 | Nomo1 Nodal modulator 1                                                      | R.VTNSNANAAGPLIVAGYN*VSGSVR.S                                     |
| 80  | IPI00113528 | Tm9sf3 Transmembrane 9 superfamily member 3                                  | R.IVDVN*LTSEGK.V                                                  |
| 81  | IPI00116355 | Gfra2 GDNF family receptor alpha-2                                           | R.NAIQAFGN*GTDVNM#SPK.G                                           |
| 82  | IPI00134691 | Ugt1a1;Ugt1a2 UDP-glucuronosyltransferase 1-1                                | K.EN*VTATLVELGR.T                                                 |
| 83  | IPI00418163 | C4B;C4A complement<br>component 4B preproprotein                             | FSDGLESNSSTQFEVK                                                  |
| 84  | IPI00132600 | Npc1 Niemann-Pick C1 protein                                                 | R.LIASN*ITETM#R.S                                                 |
| 85  | IPI00138061 | Cr1l Isoform 1 of Complement regulatory protein Crry                         | R.IN*YTCNQGYR.L                                                   |
| 86  | IPI00117630 | Itp1 Isoform 7 of Inositol 1,4,5-trisphosphate receptor type 1               | R.VETGEN*CTSPAPK.E                                                |
| 87  | IPI00136642 | Serpinc1 Antithrombin-III                                                    | K.LGACN*DTLK.Q                                                    |
| 88  | IPI00123920 | Serpina1c Alpha-1-antitrypsin 1-3                                            | K.GDTHQTILEGLQFN*LTQTSEADIHK.S                                    |
| 89  | IPI00121038 | Vcan Isoform V0 of Versican core protein                                     | R.FEN*QTCFPLPDSR.F                                                |
| 90  | IPI00110598 | Gabra2 Gamma-aminobutyric acid receptor subunit alpha-2                      | K.SVAHN*MTM#PNK.L                                                 |
| 91  | IPI00222921 | Slc9a7 Isoform 1 of Sodium/hydrogen exchanger 7                              | R.AFSTLLVN*VSGK.F                                                 |
| 92  | IPI00296608 | C7 Complement<br>component C7                                                | NYTLTGR<br>INNDFNYEFYNSTWSYVK                                     |
| 93  | IPI00122257 | Nt5e 5'-nucleotidase                                                         | R.IKLDN*YSTQELGR.T                                                |
| 94  | IPI00154056 | Acp2 Lysosomal acid phosphatase                                              | R.YEQLQN*ETR.Q                                                    |
| 95  | IPI00123613 | Pacsin1 Protein kinase C and casein kinase substrate in neurons<br>protein 1 | K.KAEGATLSN*ATGAVESTSQAGDR.G                                      |
| 96  | IPI00409336 | Gabbr2 Gamma-aminobutyric acid type B receptor subunit 2                     | R.IQDFN*YTDHTLGR.I                                                |
| 97  | IPI00109108 | Stt3a Putative uncharacterized protein                                       | R.TILVDN*NTWN*NTHISR.V<br>R.TILVDN*NTWN*NTHISR.V                  |
| 98  | IPI00228680 | Nrxn3 neurexin III                                                           | R.INCN*SSKGPETLYAGQK.L                                            |
| 99  | IPI00131091 | C4a;C4b Complement C4-B                                                      | K.ALN*VTLSSM#GR.N                                                 |
| 100 | IPI00022463 | TF Serotransferrin                                                           | CGLVPVLAENYNK<br>QQQHFLFGSNVTDCSGNFCLFR                           |

|     |             |                                                                              |                               |
|-----|-------------|------------------------------------------------------------------------------|-------------------------------|
| 101 | IPI00119035 | Acan Aggrecan core protein                                                   | R.TVYLHAN*QTGYDPDSSR.Y        |
| 102 | IPI00120066 | Prom1 Isoform 1 of Prominin-1                                                | K.SLQDAATQLNTN*LSSVR.N        |
| 103 | IPI00113726 | Lama1 Laminin subunit alpha-1                                                | R.VCDGN*STNPR.E               |
| 104 | IPI00225153 | Shisa7 Isoform 1 of Protein shisa-7                                          | R.LTGALAGGGSAAGTSAN*ATK.T     |
| 105 | IPI00170303 | Lgi2 Isoform 1 of Leucine-rich repeat LGI family member 2                    | R.SYDN*ITGQSIVGCK.A           |
| 106 | IPI00408895 | Tgoln1 Trans-Golgi network integral membrane protein 1                       | R.RQPEKTDAELN*ETARPLSPVNP.K.L |
| 107 | IPI00122048 | Atp1a3 Sodium/potassium-transporting ATPase subunit alpha-3                  | K.GVGIISEGN*ETVEDIAAR.L       |
| 108 | IPI00129159 | Neo1 Isoform 1 of Neogenin                                                   | R.TPASDPHGDN*LTYSVFYTK.E      |
| 109 | IPI00330887 | Negr1 Neuronal growth regulator 1                                            | R.SILTVTN*VTQEHFGN*YTCVAANK.L |
|     |             |                                                                              | R.SILTVTN*VTQEHFGN*YTCVAANK.L |
| 110 | IPI00134191 | Slc2a3 Solute carrier family 2, facilitated glucose transporter member 3     | K.DFLN*YTLER.L                |
| 111 | IPI00876200 | AI593442 Uncharacterized protein C11orf87 homolog                            | R.TFASHN*ASGGSSAGLR.S         |
| 112 | IPI00309191 | Unc5c Isoform 1 of Netrin receptor UNC5C                                     | R.LSDTAN*YTCVAK.N             |
| 113 | IPI00471081 | Plbd1 Putative phospholipase B-like 1                                        | R.DQGN*VTDM#ASM#K.Y           |
| 114 | IPI00120302 | Lgi1 Leucine-rich glioma-inactivated protein 1                               | K.ATQLFTN*QTDIPNMEDVYAVK.H    |
| 115 | IPI00131995 | Hapln1 Hyaluronan and proteoglycan link protein 1                            | R.GGN*VTLPCF.F                |
| 116 | IPI00969516 | LOC100293534 similar to complement component 4B (Chido blood group), partial | GLNVTLSSTGR                   |
| 117 | IPI00553387 | Grm5 glutamate receptor, metabotropic 5 isoform a                            | K.TCN*SSLTLR.T                |
| 118 | IPI00128358 | Insr Insulin receptor                                                        | K.HN*LTITQGK.L                |
| 119 | IPI00136925 | Igj Immunoglobulin J chain                                                   | R.EN*ISDPTSPLR.R              |
| 120 | IPI00120115 | S1pr1 sphingosine 1-phosphate receptor 1                                     | R.HYN*YTGK.L                  |
| 121 | IPI00396687 | Dpp10 inactive dipeptidyl peptidase 10                                       | R.WIN*DTVVVYK.T               |
| 122 | IPI00224752 | Atrn Attractin                                                               | R.GICN*ASDTR.G                |
| 123 | IPI00356667 | Pcdh17 protocadherin 17 precursor                                            | K.DSGAPAHLESN*ATVR.V          |
| 124 | IPI00331564 | Dld Putative uncharacterized protein                                         | K.TVCIEKN*ETLGGTCLNVGCIPSK.A  |
| 125 | IPI00418153 | IGHM Putative uncharacterized protein DKFZp686I15212                         | EEQYNSTFR                     |
| 126 | IPI00123342 | Hyou1 Hypoxia up-regulated protein 1                                         | R.VFGSQN*LTTVK.L              |
| 127 | IPI00314726 | Naglu alpha-N-acetylglucosaminidase                                          | R.LLLTAAPN*LTTSPA.FR.Y        |
| 128 | IPI00342158 | Nup210 Nuclear pore membrane glycoprotein 210                                | K.GATN*NTCIIR.T               |
| 129 | IPI00291262 | CLU Isoform 1 of Clusterin                                                   | MLNTSSLLEQLNEQFNWVSR          |
|     |             |                                                                              | ELPGVCNETMMALWEECKPCLK        |

|     |             |                                           |                                                                                                                                                                                   |
|-----|-------------|-------------------------------------------|-----------------------------------------------------------------------------------------------------------------------------------------------------------------------------------|
| 130 | IPI00896380 | IGHM Isoform 2 of Ig<br>mu chain C region | MLNTSSLLEQLNEQFNWVS<br>KKEDALNETR<br>HNSTGCLR<br>EDALNETR<br>KEDALNETR<br>LANLTQGEDQYYLR<br>NNSDISSTR<br>YKNNSDISSTR<br>THTNISESHPNATFSAVGEASICEDDWNSGER<br>GLTFQQNASSMCVPDQDTAIR |
|-----|-------------|-------------------------------------------|-----------------------------------------------------------------------------------------------------------------------------------------------------------------------------------|

---
